# Supplementary material for: Plasma Lipidomics Analysis Reveals the Potential Role of Lysophosphatidylcholines in Abdominal Aortic Aneurysm Progression and Formation
Source: MDPI journal article supplement (doi:10.3390/ijms241210253), 2023-06-16
Supplement: s1 [file s1]

## Figure legends

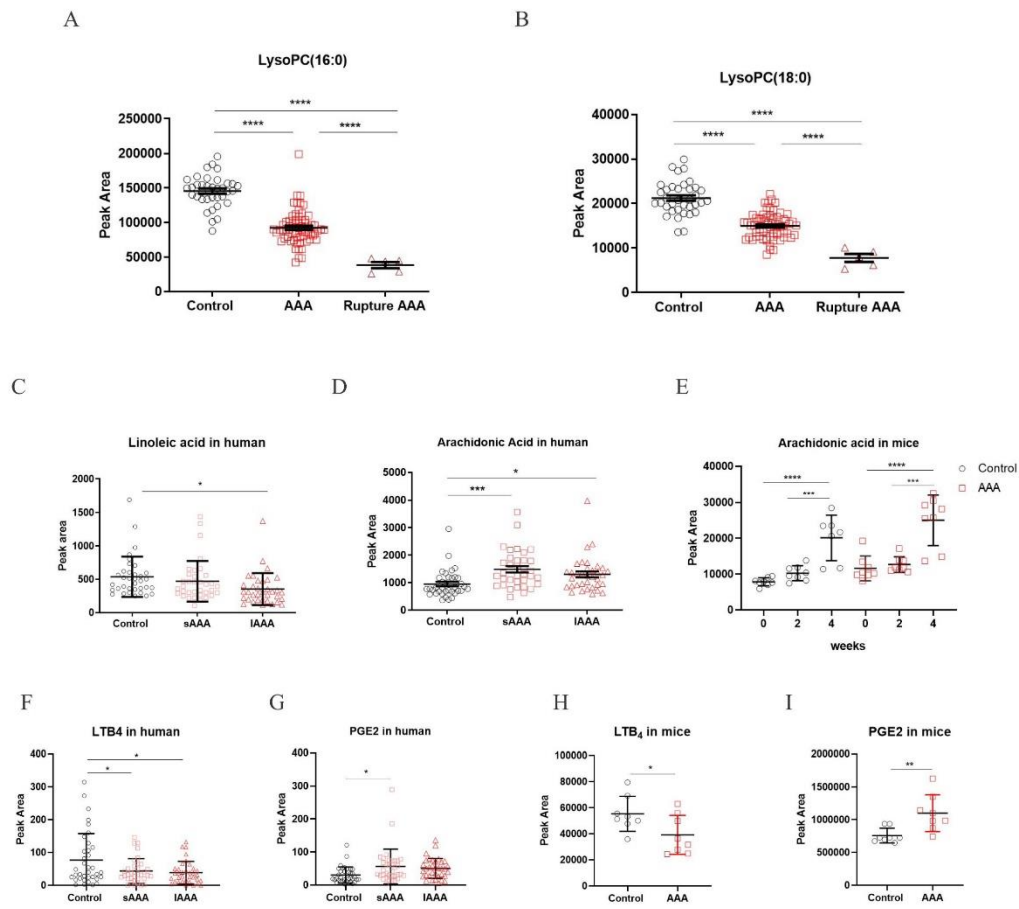

**Supplementary Figure S1.** Scatter diagram for lipids in human and mice. (A) LysoPC (16:0) in controls (n = 36), AAA (n = 65) and rupture AAA (n = 5). (B) LysoPC (18:0) in controls (n = 36), AAA (n = 65) and rupture AAA (n = 5). (C) Arachidonic acid in controls (n = 36), sAAA (n = 35) and IAAA (n = 35). (D) Arachidonic acid change in mice at 0, 2, 4 weeks in controls (n = 8) and AAA (n = 8) mice. (E) Linoleic acid in controls (n = 36), sAAA (n = 35) and IAAA (n = 35). (F,G). Leukotrienes B<sub>4</sub> (LTB<sub>4</sub>) and Prostaglandins E<sub>2</sub> (PGE<sub>2</sub>) in controls (n = 36), sAAA (n = 35) and IAAA (n = 35). (H,I) Leukotrienes B<sub>4</sub> (LTB<sub>4</sub>) and Prostaglandins E<sub>2</sub> (PGE<sub>2</sub>) in mice at 4 weeks in controls (n = 8) and AAA (n = 8) mice. \*p < 0.05, \*\*\*p < 0.001, \*\*\*\*p < 0.0001.
